# Supplementary material
Source: PubMed Central journal article supplement (PMC2920288)
Supplement: NIHMS217869-supplement-01.pdf [file NIHMS217869-supplement-01.pdf]

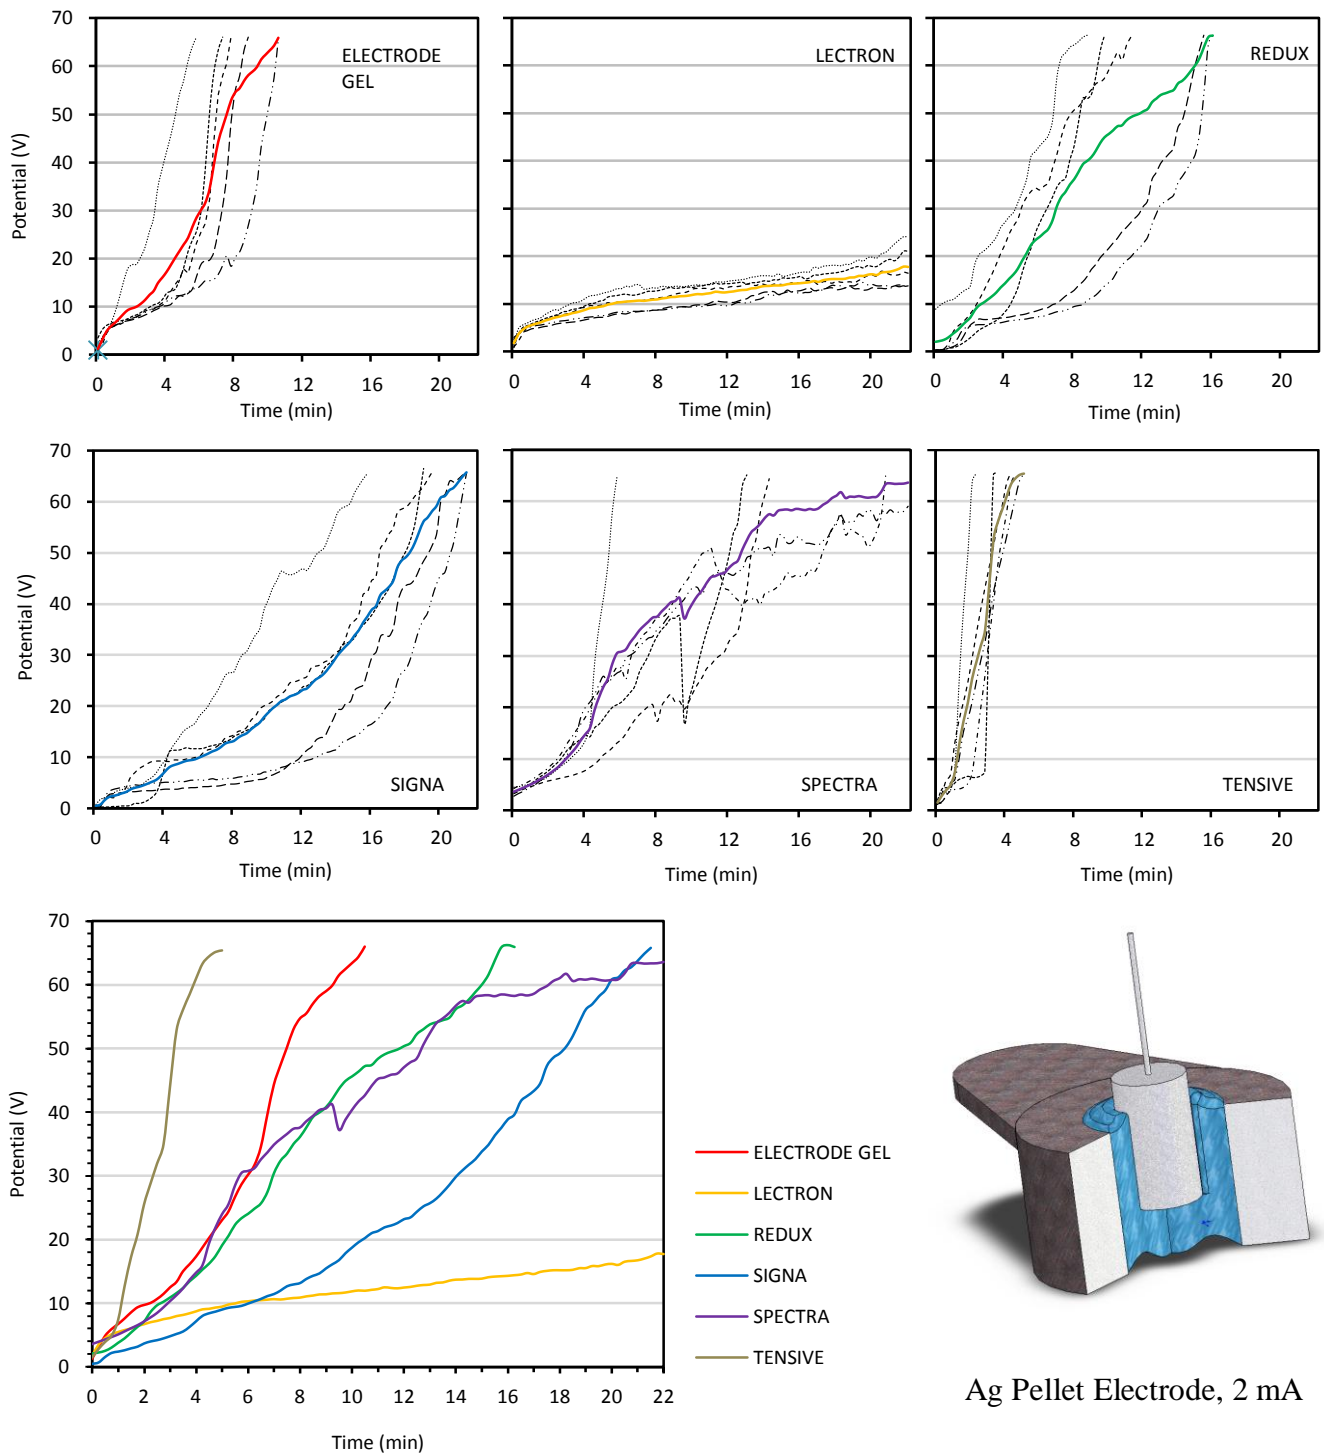

Supplementary Figure 1.A - Current induced polarization of conductive Ag Pellet electrode, shown as apparent voltage across anode against time. Voltage measured across pure Ag pellet anode is shown against time. 2mA DC current with commercially available gels was passed and change in voltage with time was measured. Black dotted curves shows five repeats while colored line shows average. The lower panel compares average voltage plots of all gels.
