# Supplementary material
Source: PubMed Central journal article supplement (PMC2920288)
Supplement: NIHMS217869-supplement-05.pdf [file NIHMS217869-supplement-05.pdf]

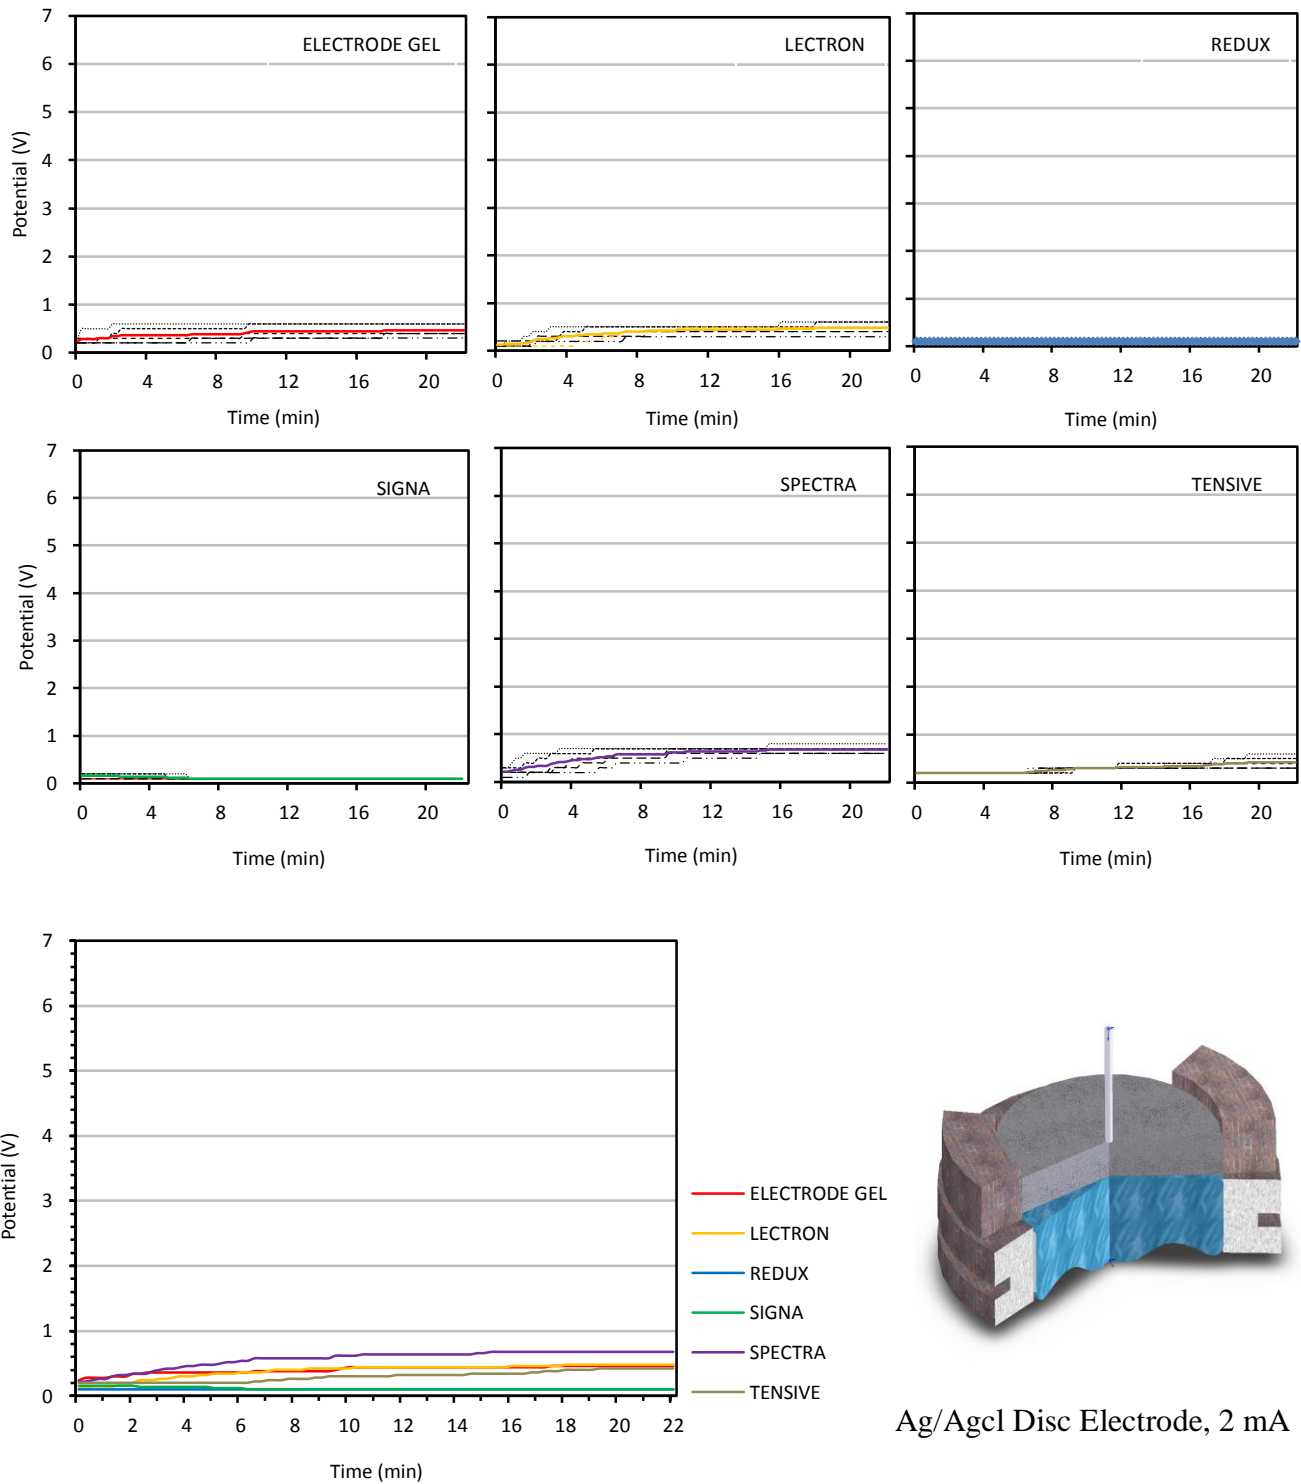

Supplementary Figure 1.E - Current induced polarization of conductive Ag/AgCl Disc electrode, shown as apparent voltage across anode against time. Voltage measured across Ag/AgCl Disc anode is shown against time. 2mA DC current with commercially available gels was passed and change in voltage with time was measured. Black dotted curves shows five repeats while colored line shows the average of five repeats. The lower panel compares average voltage plots of all gels.
